# Supplementary material for: Micro-/nanofiber-coupled superhydrophobic and conductive textile for underwater wearable strain sensors with full-scale human motion detection ability
Source: Royal Society of Chemistry journal article supplement (doi:10.1039/d3tc01324c), 2023-01-01
Supplement: d3tc01324c3.pdf [file d3tc01324c3.pdf]

# Micro/nanofiber-coupled Superhydrophobic and Conductive Textile for Wearable Strain Sensors Underwater with Full-scale Human Motion Detection Ability

Junchi Ma<sup>a,b</sup>, Yongquan Qing<sup>a,b\*</sup>, Haoyang Song<sup>a,b</sup>, Yuxuan Yao<sup>a,b</sup>, Xinyu Xu, Cai Long<sup>c</sup>, Niu Liu<sup>a,b</sup>, Hengjun Li<sup>d</sup>, Changsheng Liu<sup>a,b</sup>

<sup>a</sup>School of Materials Science and Engineering, Northeastern University, Shenyang 110819, China

<sup>b</sup>Key Laboratory for Anisotropy and Texture of Materials, Ministry of Education, Northeastern University, Shenyang 110819, China

<sup>c</sup>School of Pharmacy, Shenyang Pharmaceutical University, Shenyang 110016, China

<sup>d</sup>Guangdong Institute of Corrosion Science and Technology, Guangzhou 510700, China

## Corresponding Authors

\*Y.Q. Qing: e-mail, [qingyq@mail.neu.edu.cn](mailto:qingyq@mail.neu.edu.cn).

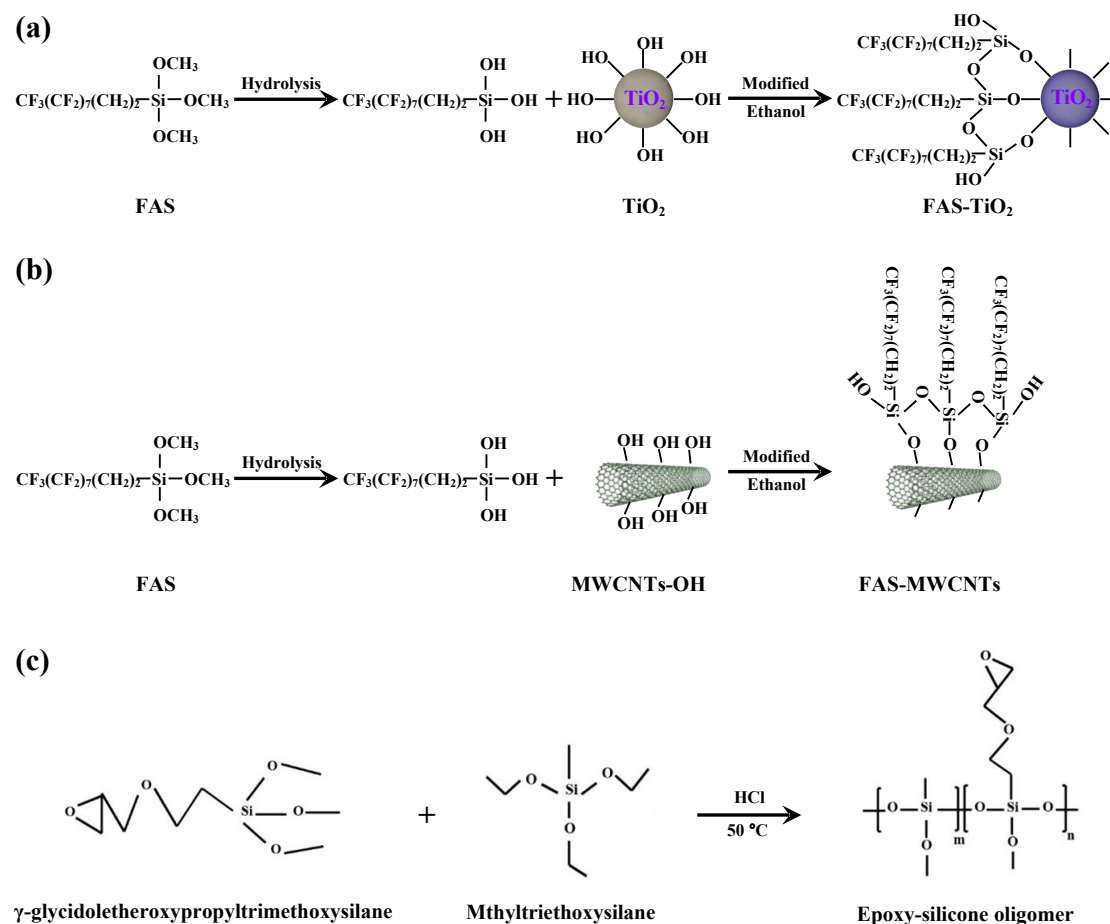

**Figure S1.** (a) 1H,1H,2H,2H-Perfluorodecyltrimethoxysilane (FAS)-grafted TiO<sub>2</sub> to obtain

hydrophobic  $\text{TiO}_2$  (FAS- $\text{TiO}_2$ ). (b) FAS-grafted MWCNT-OH to obtain hydrophobic MWCNT (FAS-MWCNT). (c) Methyltriethoxysilane and  $\gamma$ -glycidoxypropyltrimethoxysilane react to obtain epoxy-silicone oligomer under the action of an acid catalyst.

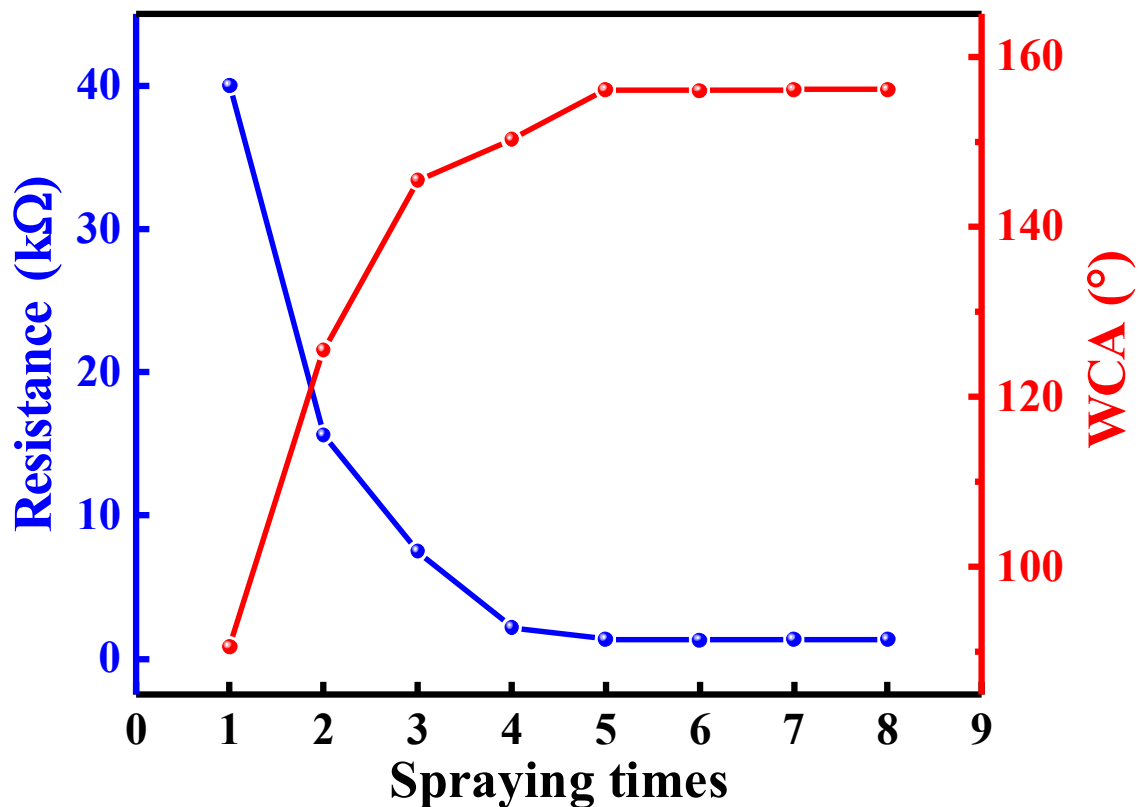

**Figure S2.** Resistance and WCA of the SNWTC as a function of spraying times.

The resistance of the SNWTC declined dramatically from 40 kΩ to 1.35 kΩ, sprayed from 1 to 5 times, then, the resistance tended to be stable at approximately 1.35 kΩ (Figure S2, Supporting Information). Meanwhile, the WCA improved to 156.1°, realizing the superhydrophobicity of the surface. These results proved that composite had been completely coated on the surface of the nylon fibers by spraying 5 times.

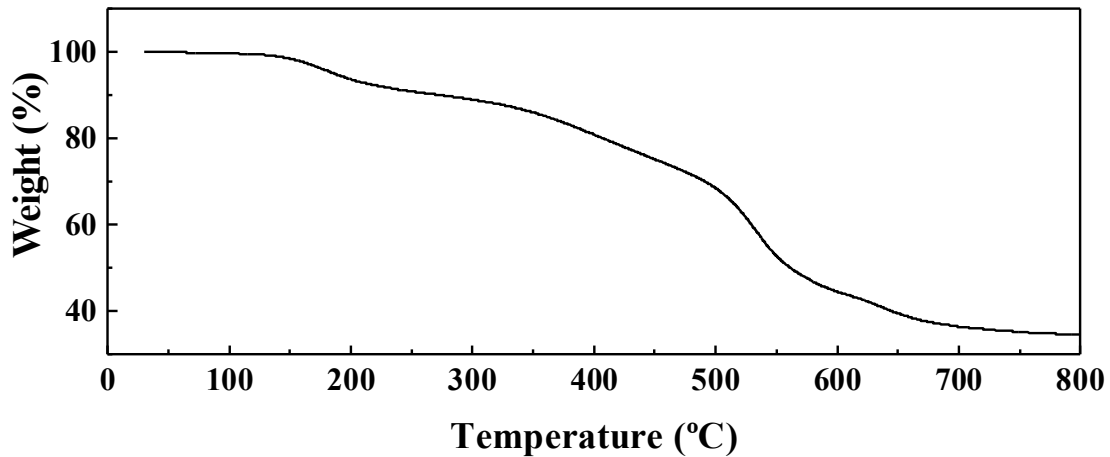

**Figure S3.** TGA curve of the superhydrophobic and conductive nano coating.

Since the physical and chemical properties of substances change at different temperatures,<sup>1,2</sup> TGA measurements of the nano coating were carried out (Figure S3). The sample was heated from 25 to 800 °C at a linear heating rate of 20 °C /min by Simultaneous Thermal Analyzer (NETZSCH STA 449 F3, Germany) with the atmosphere of air. As shown in Figure S3, the weight-loss (30%) was at 100–500 °C, arising from the decomposition of epoxy-silicone oligomer and PDMS.<sup>3, 4</sup> Another noticeable sharp weight-loss (36.5%) appeared 500–700 °C, which was attributed to the gradual decomposition of FAS-MWCNTs.<sup>5, 6</sup> Finally, the thermal decomposition products and the thermally stable FAS-TiO<sub>2</sub> were left.<sup>7</sup> The result of TGA could simply evaluate the content of each component. The content of the epoxy-silicone oligomer and PDMS was nearly 30 wt%, FAS-MWCNTs was 36.5 wt%. In addition, the result showed that the nano-coating was very stable at room temperature, it began to decompose at 150 °C. It can be safely used as the sensing material of wearable strain sensor.

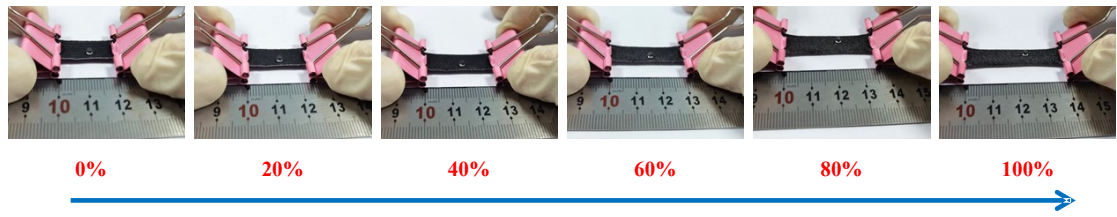

**Figure S4.** Photograph of water droplets under different strain.

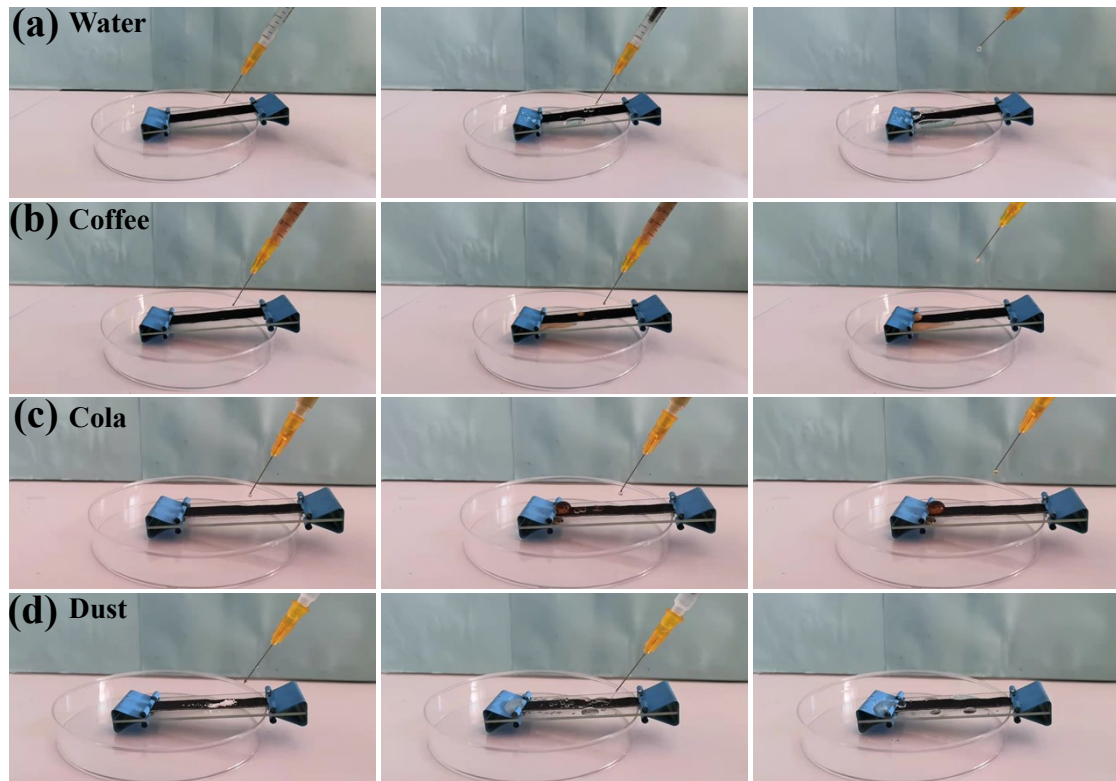

**Figure S5.** Self-cleaning process of the SNCWC surface with a small inclination angle ( $<10^\circ$ ): (a) Water, (b) Coffee, (c) Cola, and (d) Dust.

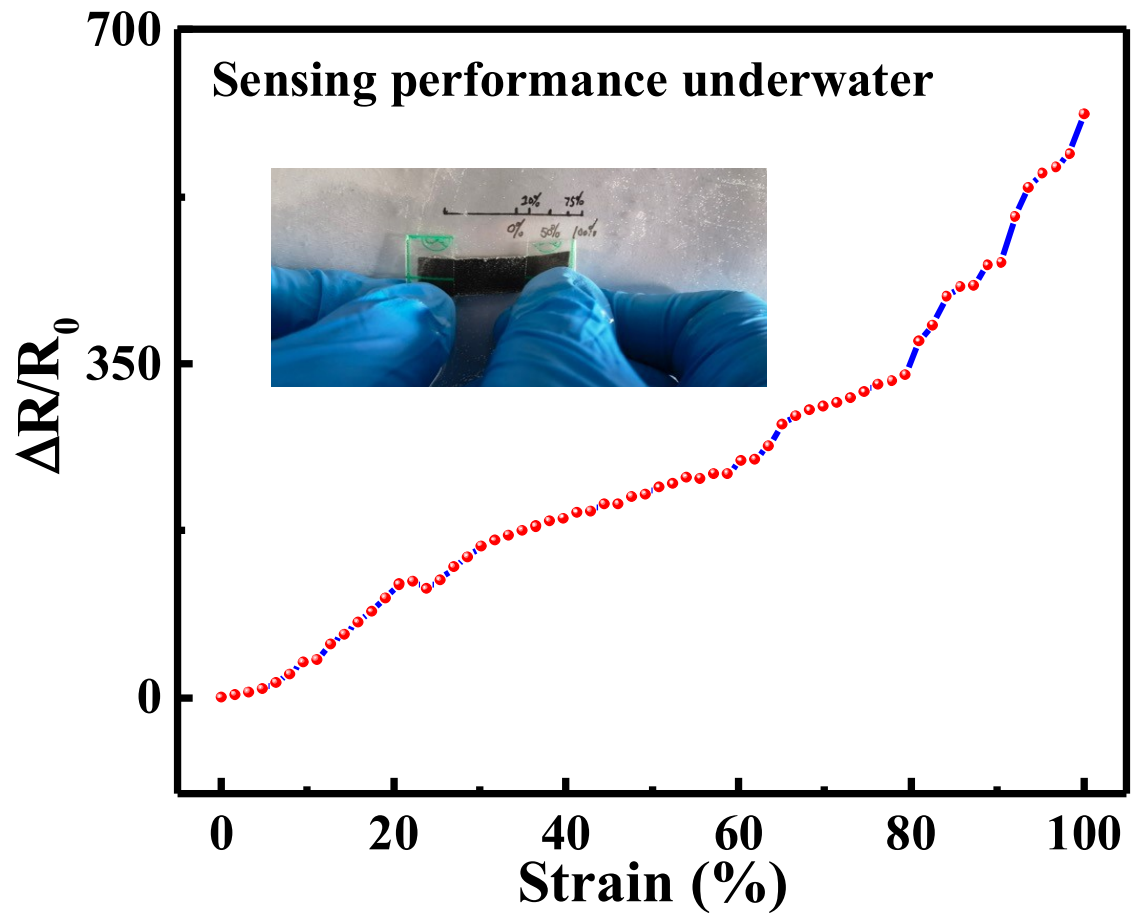

**Figure S6.** Relative resistance changes of the sensor as a function of strain underwater.

**Table. 1.** Comparative analysis of the GF values and maximum working ranges of the superhydrophobic sensor reported in previous publications.

| Reference | Materials of sensor                         | Sensing range | Gauge factor           |
|-----------|---------------------------------------------|---------------|------------------------|
| 2         | TPU/Graphene                                | 100%          | 21                     |
| 17        | PU/Graphene/SiO <sub>2</sub>                | 100%          | 5.9                    |
| 18        | TPU/ACNTs/AgNPs/PDMS                        | 70%           | 1.04 × 10 <sup>5</sup> |
| 51        | Carbon black/PDMS                           | 100%          | 67.2                   |
| 52        | MXene based composite                       | 700%          | 2.9                    |
| 53        | Natural rubber (NR)/NR-CNTs/NR              | 500%          | 2280                   |
| 39        | Polypropylene textile/MXene/PDMS            | 50%           | 18                     |
| 54        | PDMS/CNTs                                   | 100%          | 3.1                    |
| 55        | TPU/CNTs/PDMS                               | 100%          | 0.339                  |
| 56        | TPE/CNTs                                    | 76%           | 1                      |
| 57        | PDMS/CNTs                                   | 200%          | 22.64                  |
| 58        | PU/rGO/PDA/PFDT                             | 590%          | 221                    |
| This work | Nylon textile/MWCNTs/TiO <sub>2</sub> /PDMS | 100%          | 949.5                  |

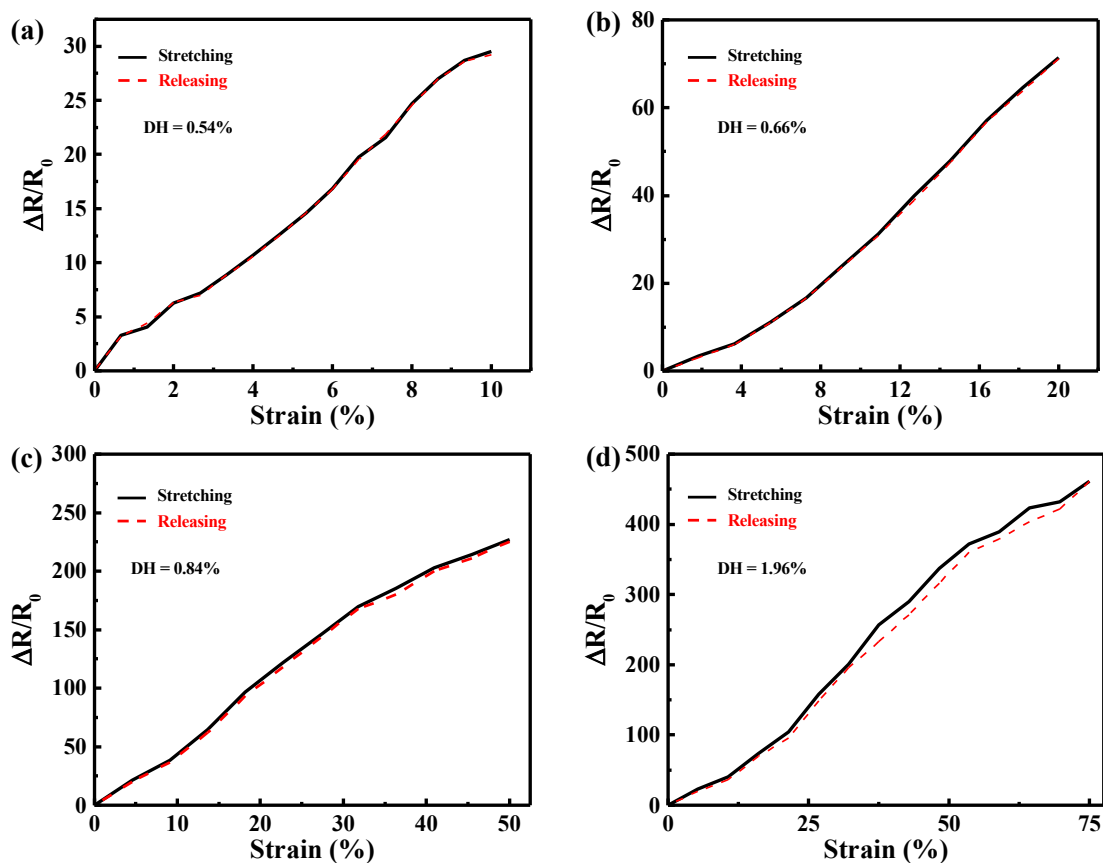

**Figure S7.** The hysteresis performance of the SNWTC strain sensors for different strain stretching/releasing: (a) 10%, (b) 20%, (c) 50%, and (d) 75%.

## Supplementary Videos

**Movie S1:** Direct antifouling test of the SNWTC surface.

**Movie S2:** Indirect antifouling test of the SNWTC surface.

## Reference

- [1] L. Liu, M. Zhu, Z. Ma, X. Xu, J. Dai, Y. Yu, S. M. Seraji, H. Wang, P. Song, *Chem. Eng. J.* **2022**, 440, 135645.
- [2] L. Liu, Z. Ma, M. Zhu, L. Liu, J. Dai, Y. Shi, J. Gao, T. Dinh, T. Nguyen L. C. Tang, P. Song, *J. Mater. Sci. Technol.* **2023**, 132, 59.
- [3] I. Bustero, I. Gaztelumendi, I. Obieta, M. A. Mendizabal, A. Zurutuza, A. Ortega, B. Alonso, *Adv. Compos. Hybrid Mater.* **2020**, 3, 31.
- [4] M. Zhu, L. Liu, Z. Wang, *Compos. Part B-Eng.* **2020**, 199, 108283.

- [5] S. Gao, H. Li, H. Guan, L. Zheng, X. Lai, W. Chen, X. Zeng, *Cellulose* **2022**, 29, 605.
- [6] L. Xu, G. Xiao, C. Chen, R. Li, Y. Mai, G. Sun, D. Yan, *J. Mater. Chem. A* **2015**, 3, 7498.
- [7] C. Lin, B. Liu, L. Pu, Y. Sun, Y. Xue, M. Chang, X. Li, X. Lu, R. Chen, J. Zhang, *Adv. Compos. Hybrid Mater.* **2021**, 4, 339.
